# Supplementary material
Source: publisher site journal article supplement (https://www.dovepress.com/article/301292)
Supplement: Supplementary file 1 [file get_supplementary_file.php]

**
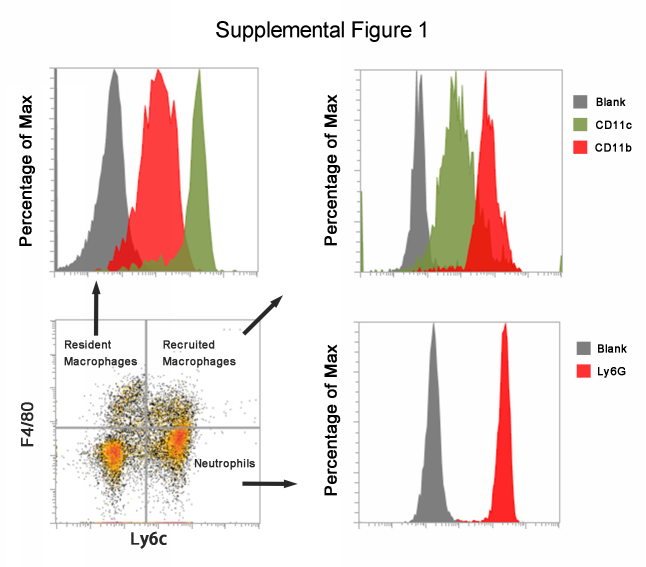
**

**
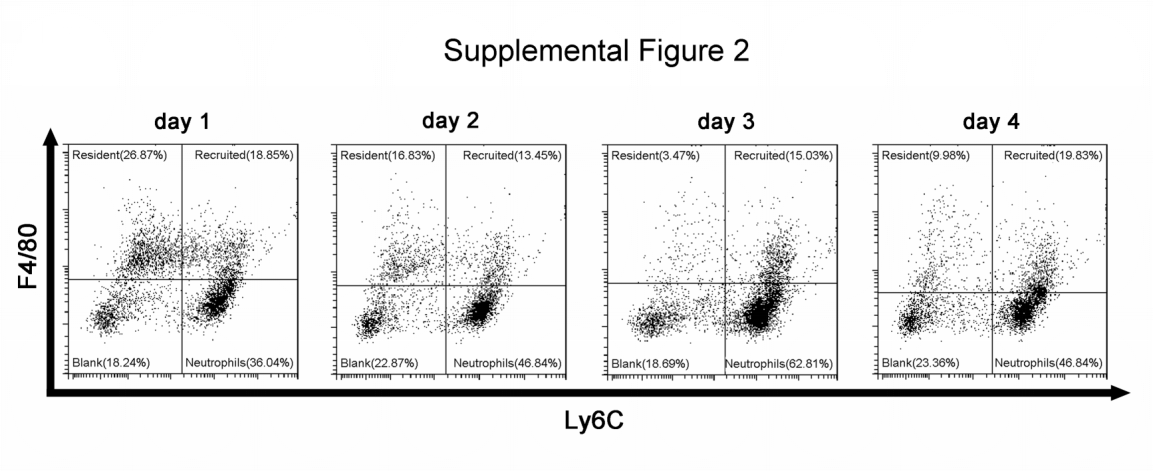
**

**Supplemental Figure 1. Resident macrophages, recruited macropahges and neutrophils were identified by different Abs.**

Anti-F4/80 PE-Cyanine7-conjugated and anti-Ly6c APC-conjugated antibodies, anti-Ly6G FITC-conjugated, anti-CD11b APC-conjugated and/or anti-CD11c PerCP-Cy5.5-conjugated antibodies were were used to differentiate resident macrophages, recruited macropahges and neutrophils. Resident macrophages were identified as F4/80+Ly6C-CD11b-CD11c+, recruited macrophages as F4/80+Ly6c+CD11b+CD11c- , and neutrophils as F4/80-Ly6c+Ly6g+.

**Supplemental Figure 2. Resident macrophage was depleted by clodronate liposome.** 50 μL of clodronate liposome (5 mg/mL) was used to deplete resident macrophages. Intratracheal administration of clodronate liposome resulted in a depletion of resident macrophages in a time dependent manner, reaching the lowest level on the third day.
